# Supplementary material
Source: PubMed Central journal article supplement (PMC5538258)
Supplement: NIHMS882574-supplement-OnlineAppendix.pdf [file NIHMS882574-supplement-OnlineAppendix.pdf]

## Supplementary Appendix

This appendix has been provided by the authors to give readers additional information about their work.

Supplement to: Seymour CW, Gesten F, Prescott HC, et al. Time to treatment and mortality during mandated emergency care for sepsis. *N Engl J Med*. DOI: 10.1056/NEJMoa1703058

## Supplementary Appendix

### Time to treatment and mortality during statewide mandated sepsis care in the emergency department

| Table of Contents                                                                                                                                                   | Page |
|---------------------------------------------------------------------------------------------------------------------------------------------------------------------|------|
| List of Investigators.....                                                                                                                                          | 3    |
| Supplementary Methods.....                                                                                                                                          | 4    |
| Figure S1. Patient accrual.....                                                                                                                                     | 6    |
| Figure S2. Calibration plot of the risk adjustment model for in-hospital mortality.....                                                                             | 7    |
| Figure S3. Risk adjusted odd ratio of in-hospital mortality with 95% confidence interval for each hour until administration of broad spectrum antibiotics.....      | 8    |
| Figure S4. Risk-adjusted odd ratio of in-hospital mortality with 95% confidence interval for each hour until completion of the initial IV fluid bolus.....          | 9    |
| Figure S5. Risk-adjusted odds ratio of in-hospital mortality with 95% confidence interval for each hour until blood cultures obtained.....                          | 10   |
| Figure S6. Risk-adjusted odds ratio of in-hospital mortality with 95% confidence interval for each hour until the initial serum lactate measurement.....            | 11   |
| Figure S7. Quantitative bias analysis.....                                                                                                                          | 12   |
| Figure S8. Reliability adjusted rates for each hospital for receiving antibiotics within 3 hours (Panel A) and completing the initial IV fluid bolus (Panel B)..... | 13   |
| Table S1. Details of 3 and 6-hour bundle elements.....                                                                                                              | 14   |
| Table S2. Sample of audit results.....                                                                                                                              | 15   |

|                                                                                                                                                               |    |
|---------------------------------------------------------------------------------------------------------------------------------------------------------------|----|
| <b>Table S3.</b> Descriptive characteristics of 4,759 encounters who did not complete the 3-hour bundle within 12 hours.....                                  | 16 |
| <b>Table S4.</b> Additional patient characteristics.....                                                                                                      | 17 |
| <b>Table S5.</b> Risk adjusted odds ratio of in-hospital mortality with 95% confidence interval for time to completing the 3-hour bundle and confounders..... | 18 |
| <b>Table S6.</b> Sensitivity analyses.....                                                                                                                    | 20 |
| <b>Table S7.</b> Hospital characteristics stratified by quartile of risk and reliability-adjusted rate of completing the 3-hr bundle within 3 hours.....      | 21 |
| <b>References</b> .....                                                                                                                                       | 22 |

## **List of Investigators**

Christopher W. Seymour

Foster Gesten

Hallie C. Prescott

Marcus E. Friedrich

Theodore J. Iwashyna

Gary Phillips

Stanley Lemeshow

Tiffany Osborn

Kathy M. Terry

Mitchell M. Levy

## Supplementary Methods

### A. Sepsis identification strategies across New York State hospitals

New York hospitals were instructed to identify severe sepsis and septic shock cases using protocols with criteria suggested in Sepsis-2.0.<sup>1</sup> In the case report form, four categories were used to categorize how cases were identified at each facility.

#### i. Positive sepsis screening from clinical assessment, N=35,514 patients (72%)

- This category indicates that the facility used some form of screening of ED patients or inpatients, and the result was positive for sepsis/severe sepsis/septic shock
- For many facilities, the sepsis screen tool will utilize an assessment for at least 2 of the 4 SIRS criteria (temp, heart rate, respiratory rate, WBC's) **and** a suspected/confirmed infection
- This screening process can also incorporate clinical assessments for blood pressure/hypotension, altered mental status, etc.
- Laboratory values (e.g. WBCs, serum lactate levels, creatinine, bilirubin, etc.) may also contribute to a positive screening, but for this category, lab values are **not always** necessary to reach a positive screening result

#### ii. Positive sepsis screen from clinical assessment AND abnormal laboratory values, N=5,920 patients (12%)

- This category includes the components of the previous category **plus** laboratory values
- In some facilities when the initial screening of a patient comes back as positive for possible sepsis, immediate laboratory tests are ordered. The clinician then used the laboratory values in deciding whether or not to initiate their protocol
- For this category, any laboratory value can be used that supports the sepsis assessment qualifies (WBC counts, % of band cells, platelet counts, serum lactate, blood glucose, creatinine, bilirubin, C-reactive protein, procalcitonin, coagulation abnormalities- INR/aPTT, blood gases)

**iii. Positive sepsis screen from clinical assessment AND code sepsis, N=7,897 patients (16%)**

- This category includes a positive sepsis screen by clinical assessment
- However, it identifies patients in whom a code sepsis or rapid response team call initiates the case identification

**Figure S1.** Patient accrual.

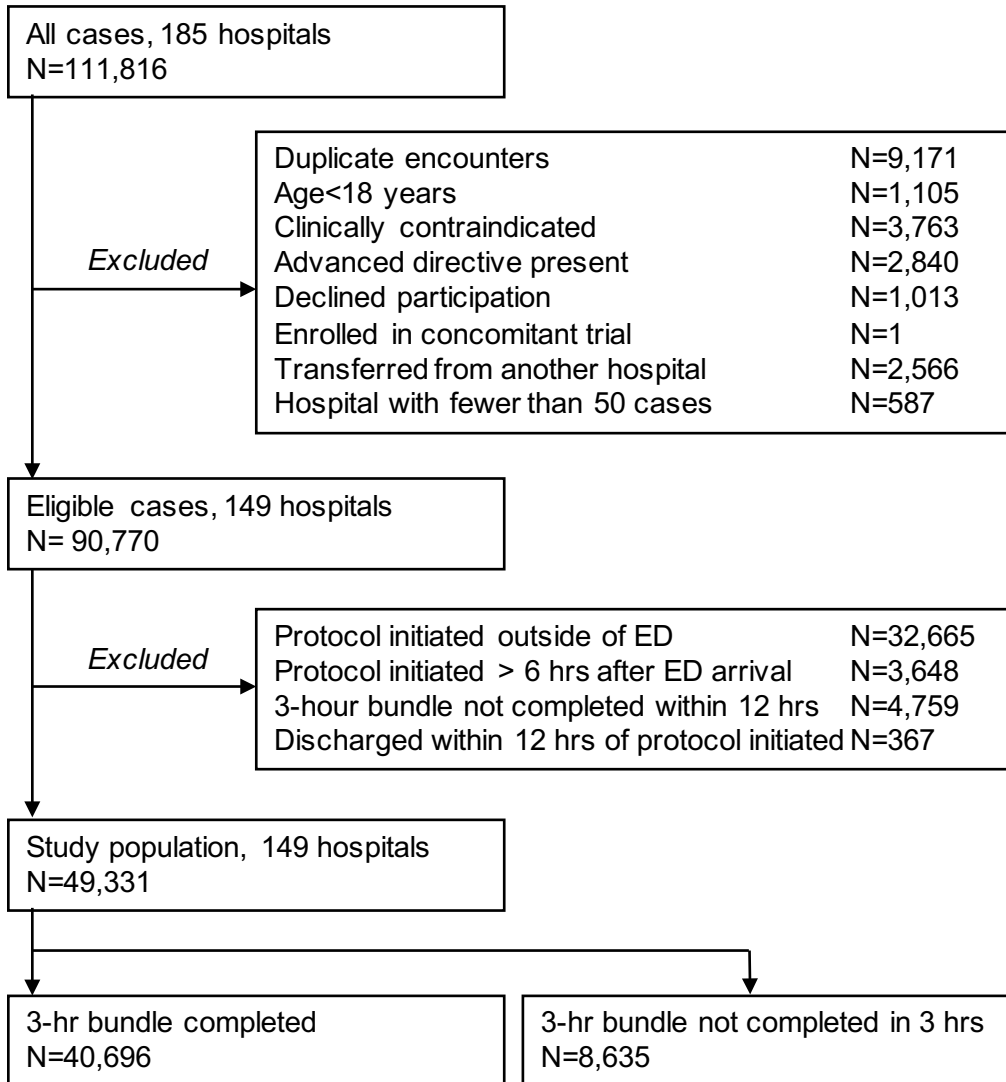

**Figure S2.** Calibration plot of the observed in-hospital mortality (x axis) vs. the expected in-hospital mortality (y axis) by decile of predicted risk. Derived from multivariable logistic regression model in internal validation cohort (N=4,319) using only risk-adjustment variables.

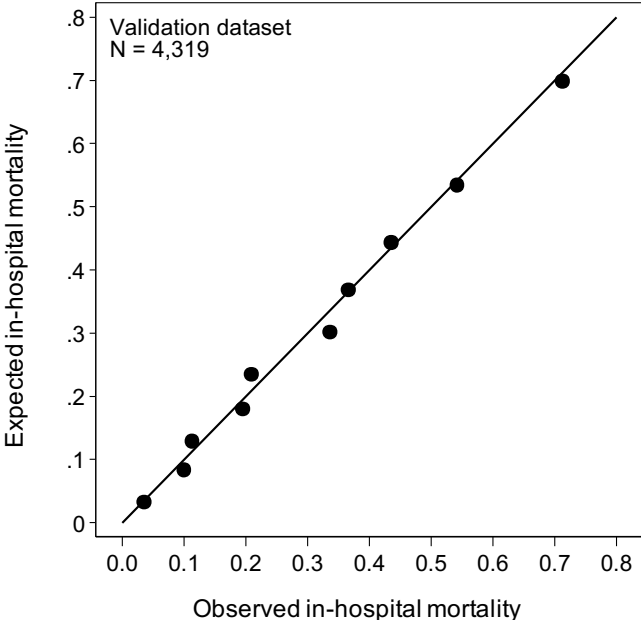



**Figure S3.** Risk-adjusted odd ratios of in-hospital mortality with 95% confidence interval for each hour until administration of broad spectrum antibiotics from primary model and multiple *a priori* subgroups

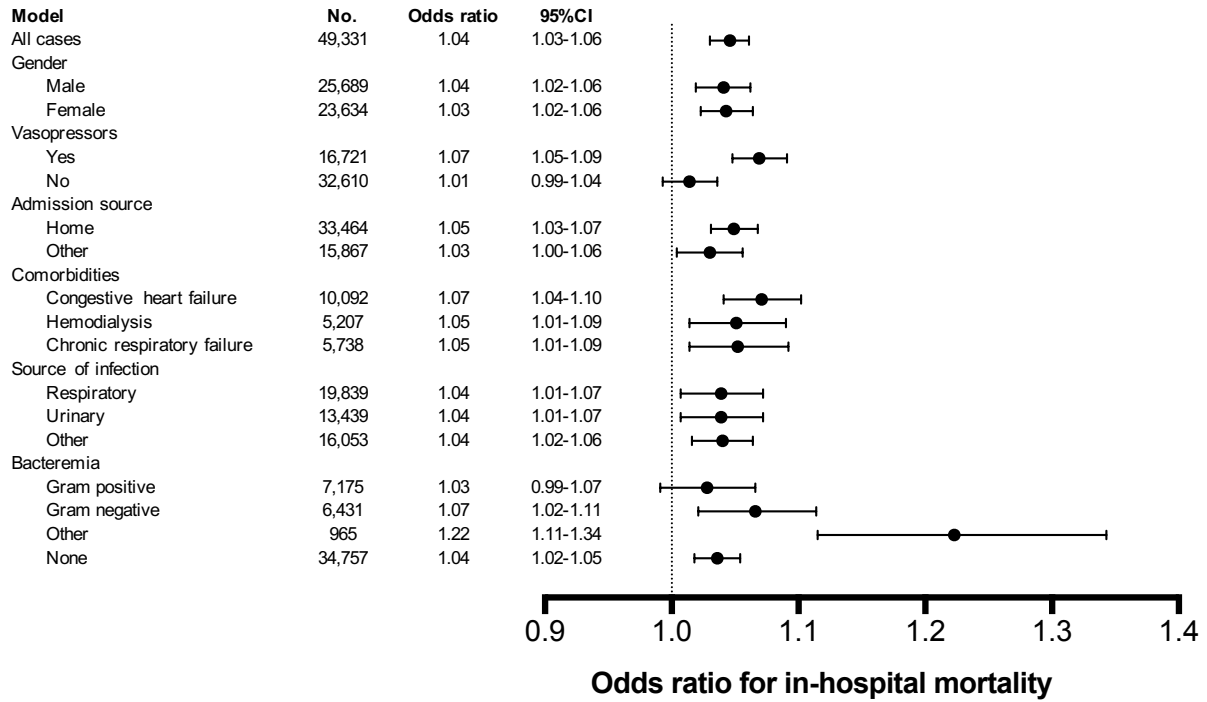

**Figure S4.** Risk-adjusted odd ratios of in-hospital mortality with 95% confidence interval for each hour in time to completion of the initial IV fluid bolus from primary model and multiple *a priori* subgroups

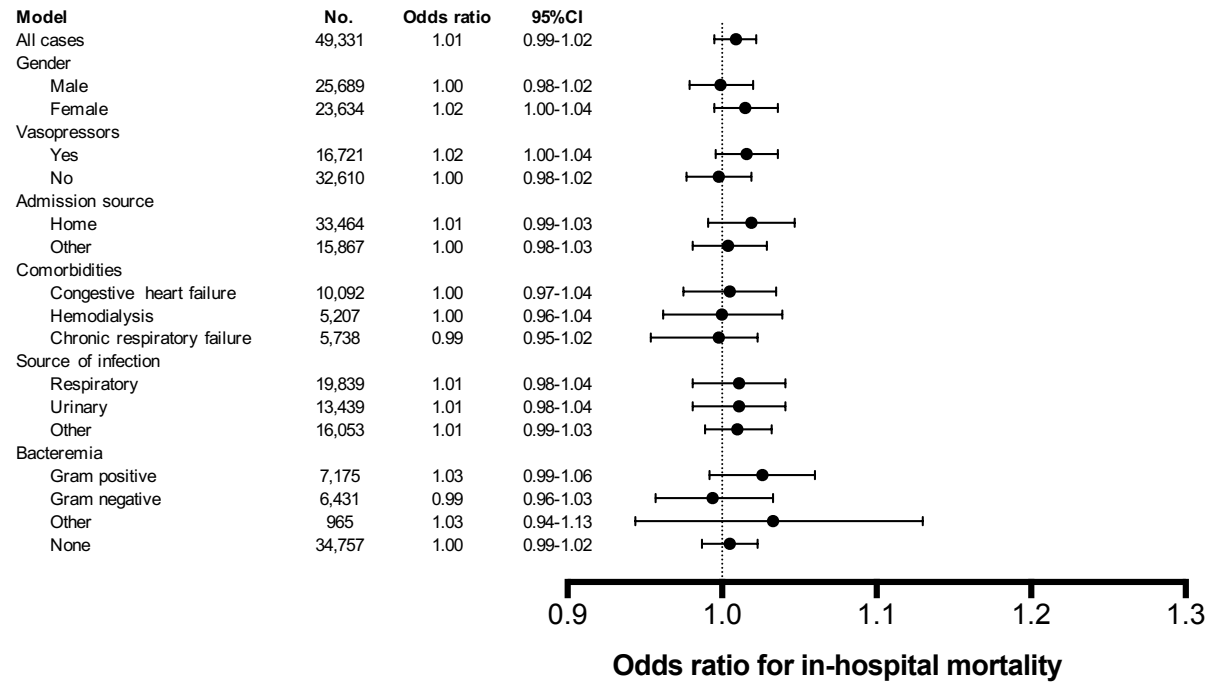

**Figure S5.** Risk-adjusted odd ratios of in-hospital mortality with 95% confidence interval for each hour in time to measurement of serum lactate from primary model and multiple *a priori* subgroups

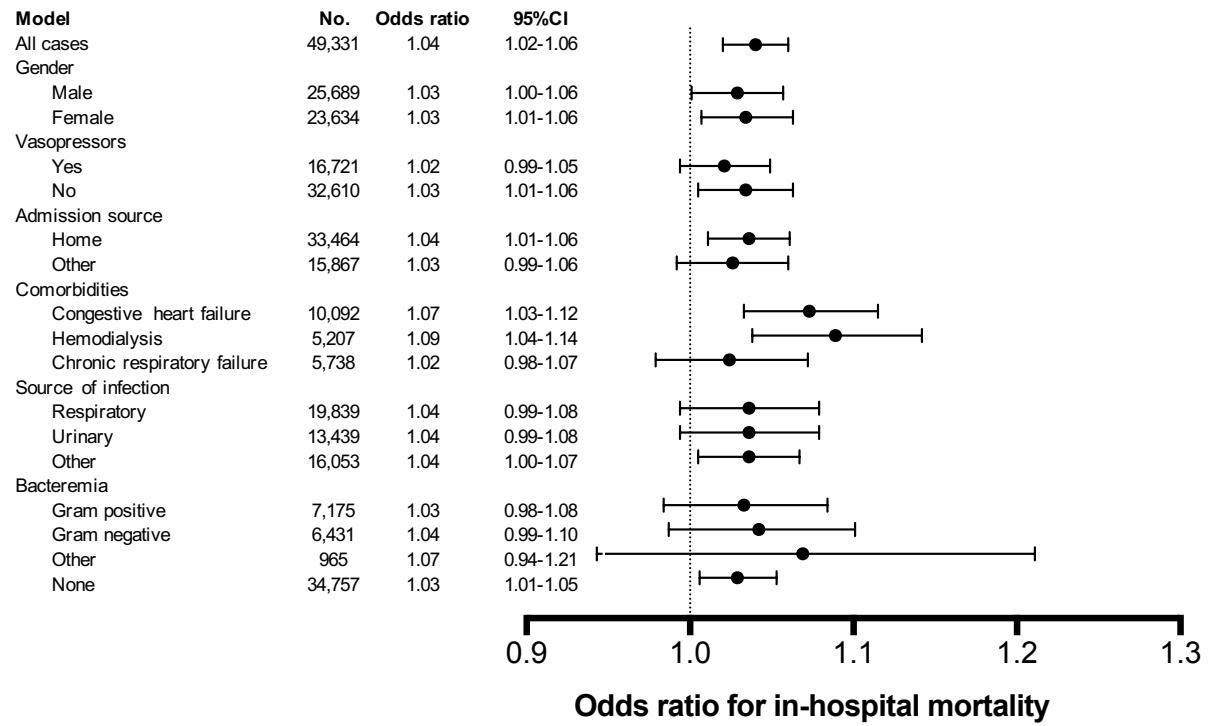

**Figure S6.** Risk-adjusted odd ratios of in-hospital mortality with 95% confidence interval for each hour in time to blood cultures obtained from primary model and multiple *a priori* subgroups

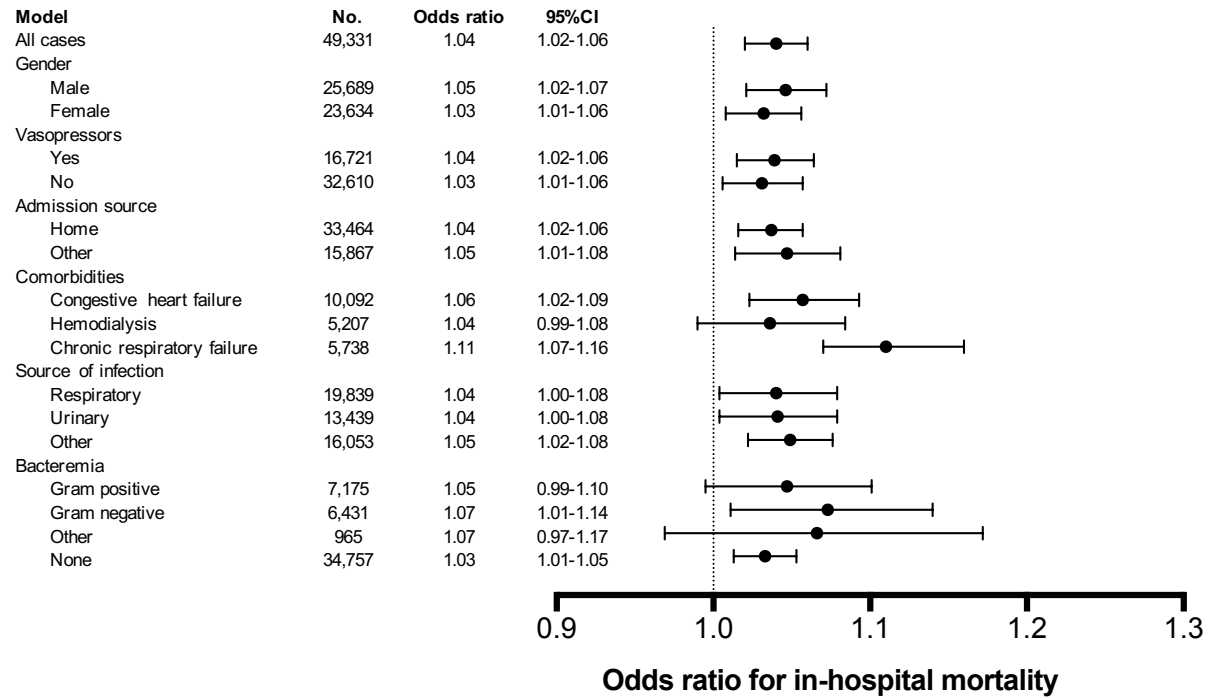

**Figure S7.** Quantitative bias analysis of a hypothetical unmeasured confounder.<sup>2</sup> This plot shows the strength of a hypothetical confounder (x axis, univariate odds ratios of confounder with in-hospital mortality) versus the odds ratio of in-hospital mortality from our adjusted model for completing the 3-hour bundle if the hypothetical confounder was included (y axis). Blue line corresponds to prevalence of hypothetical confounder (0.20) among (exposed) patients completing the 3-hour bundle one hour later than a comparable patient (unexposed), while the black line corresponds to a lower prevalence (0.15).

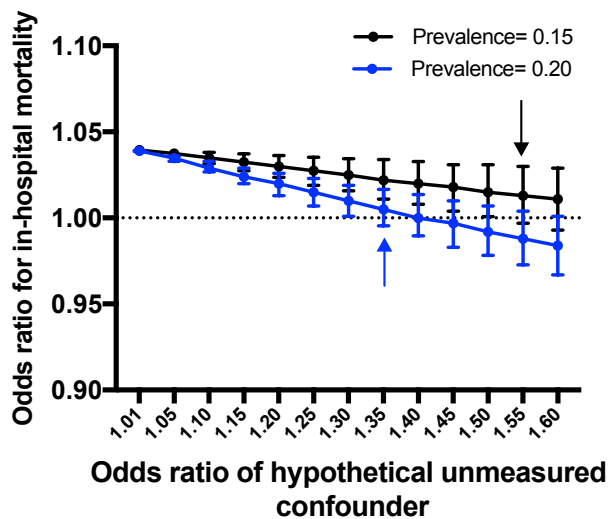

*Model assumptions:*

- Prevalence of unmeasured confounder among unexposed (completing 3-hour bundle one hour earlier) is 0.10.
- No modification of the effect of time to completing the 3-hour bundle by the unmeasured confounder
- Unmeasured confounder uncorrelated with other variables in the model

*Interpretive example:* To abrogate the odds ratio for the time to completing the 3-hour bundle from our primary model (OR=1.04, 95%CI: 1.02-1.06), the hypothetical unmeasured confounder must be twice as common among exposed vs. unexposed and have an odds ratio for in-hospital mortality that exceeds 1.35. Stronger confounders are required if the prevalence among exposed is lower.

**Figure S8.** Reliability adjusted rates across hospitals of receiving broad spectrum antibiotics within 3 hours (*Panel A*) and completing the initial IV fluid bolus within 6 hours (*Panel B*). Error bars are 95% confidence intervals.

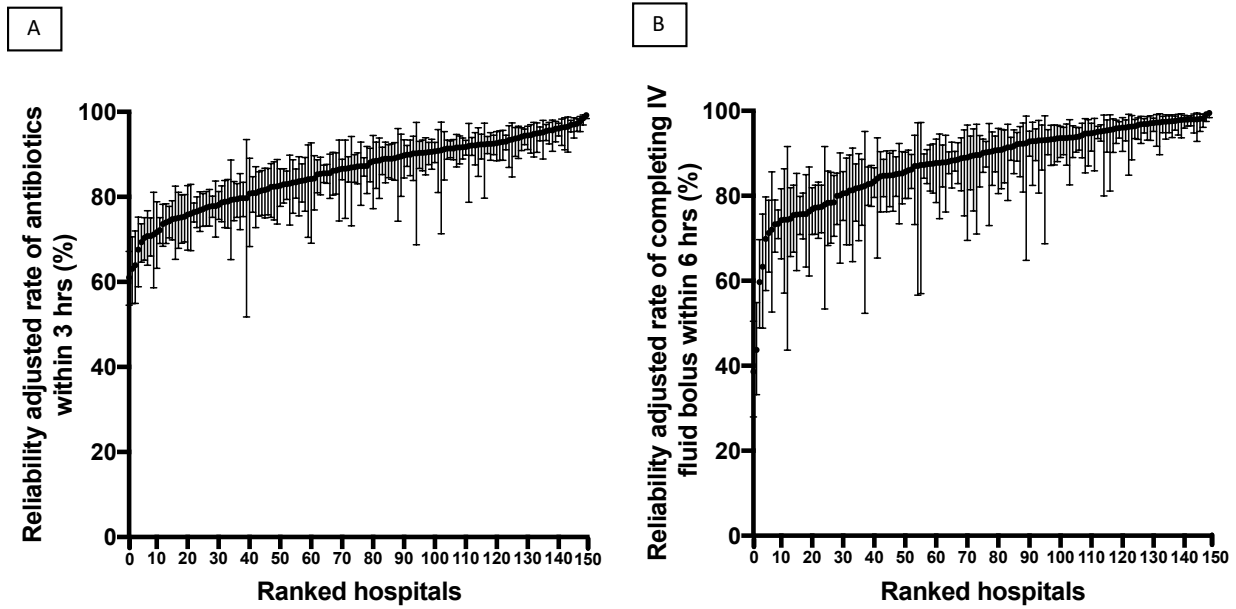

**Table S1.** Details of the 3- and 6- hour severe sepsis and septic shock bundles

| <b>Bundle</b> | <b>Eligible</b>                                              | <b>Elements</b>                                                       |
|---------------|--------------------------------------------------------------|-----------------------------------------------------------------------|
| 3-hour        | Severe sepsis or septic shock                                | Administration of antibiotics within 1 hour of protocol initiation *  |
|               |                                                              | Drawing blood cultures prior to administration of antibiotics         |
|               |                                                              | Measurement of blood lactate within 3 hours of protocol initiation    |
| 6-hour        | Above plus hypotension (SBP<90) or serum lactate ≥4.0 mmol/L | Administration of a 30cc/kg intravenous fluid bolus                   |
|               |                                                              | Administration of vasopressors for refractory hypotension             |
|               |                                                              | Re-measurement of serum lactate within 6 hours of protocol initiation |

\* To be considered compliant with the 3-hour bundle within 3 hours in the primary statistical analysis, broad spectrum antibiotics were considered complete if within 3 hours after the protocol was initiated.

**Table S2.** Sample of New York State audit of database variables, including sepsis characteristics, comorbidities, laboratory values, and 3 and 6-hour bundle elements.

| <b>Variable</b>                          | <b>No. of charts audited</b> | <b>Proportion of cases with agreement (%)</b> |
|------------------------------------------|------------------------------|-----------------------------------------------|
| <i>Sepsis data</i>                       |                              |                                               |
| Severe sepsis / shock present            | 7,492                        | 98.4                                          |
| Infection etiology                       | 7,492                        | 87.8                                          |
| Site of infection                        | 5,452                        | 98.9                                          |
| <i>Comorbidities</i>                     |                              |                                               |
| Chronic respiratory failure              | 2,039                        | 89.9                                          |
| Congestive heart failure                 | 2,039                        | 93.4                                          |
| Chronic renal failure                    | 2,039                        | 92.7                                          |
| <i>Laboratory values and vital signs</i> |                              |                                               |
| Platelet count                           | 5,452                        | 97.7                                          |
| Lactate level                            | 7,492                        | 93.9                                          |
| Hypotension                              | 7,492                        | 90.0                                          |
| <i>Bundle elements</i>                   |                              |                                               |
| Blood cultures obtained                  | 7,492                        | 96.7                                          |
| Lactate reported                         | 7,492                        | 99.0                                          |
| Antibiotics given                        | 7,492                        | 92.5                                          |
| 30cc/kg IV fluid bolus completed         | 7,492                        | 75.2                                          |
| Vasopressors given                       | 7,492                        | 97.3                                          |
| <i>Outcome data</i>                      |                              |                                               |
| ICU admission                            | 7,492                        | 99.3                                          |
| Discharge status                         | 7,492                        | 99.2                                          |



**Table S3.** Characteristics of patients not completing the 3-hour bundle within 12 hours after protocol initiated (N=4,759) compared to primary cohort (N=49,331)

| <b>Variable</b>                           | <b>Did not complete the bundle within 12 hours</b> | <b>Primary cohort (completed the 3-hr bundle within 12 hours)</b> |
|-------------------------------------------|----------------------------------------------------|-------------------------------------------------------------------|
| No.                                       | <b>4,759</b>                                       | <b>49,331</b>                                                     |
| Age at admission, median (IQR)            | 72 (60 - 84)                                       | 73 (60 - 83)                                                      |
| Gender, no. (%)                           |                                                    |                                                                   |
| Female                                    | 2,421 (50.9)                                       | 23,634 (47.9)                                                     |
| Male                                      | 2,336 (40.1)                                       | 25,689 (52.1)                                                     |
| Race, no. (%)                             |                                                    |                                                                   |
| White                                     | 2,967 (62.3)                                       | 33,075 (67.0)                                                     |
| Black                                     | 929 (19.5)                                         | 8,269 (16.8)                                                      |
| Asian                                     | 198 (4.2)                                          | 2,167 (4.4)                                                       |
| Other                                     | 665 (14.0)                                         | 5,820 (11.8)                                                      |
| Ethnicity, no. (%)                        |                                                    |                                                                   |
| Spanish/Hispanic origin                   | 459 (9.6)                                          | 4,851 (9.8)                                                       |
| Not of Spanish/Hispanic                   | 3,698 (77.7)                                       | 39,588 (80.2)                                                     |
| Unknown                                   | 599 (12.6)                                         | 4,874 (9.9)                                                       |
| Multi-ethnic                              | 3 (0.1)                                            | 18 (0.0)                                                          |
| Comorbidities, no. (%)                    |                                                    |                                                                   |
| Chronic respiratory failure               | 617 (13.0)                                         | 5,738 (11.6)                                                      |
| Congestive heart failure                  | 1,047 (22.0)                                       | 10,092 (20.5)                                                     |
| End-stage renal disease                   | 687 (14.4)                                         | 5,207 (10.6)                                                      |
| Admission source, no. (%)                 |                                                    |                                                                   |
| Home                                      | 3,414 (71.7)                                       | 33,464 (67.8)                                                     |
| Clinic                                    | 202 (4.2)                                          | 1,793 (3.6)                                                       |
| Skilled nursing facility                  | 1,038 (21.8)                                       | 13,233 (26.8)                                                     |
| Other                                     | 105 (2.3)                                          | 841 (1.8)                                                         |
| Site of infection, no. (%)                |                                                    |                                                                   |
| Urinary                                   | 1,164 (24.5)                                       | 13,439 (27.2)                                                     |
| Respiratory                               | 1,682 (35.3)                                       | 19,839 (40.2)                                                     |
| Gastrointestinal                          | 703 (14.8)                                         | 4,649 (9.4)                                                       |
| Skin                                      | 290 (6.1)                                          | 3,480 (7.1)                                                       |
| Central Nervous System                    | 13 (0.3)                                           | 239 (0.5)                                                         |
| Other                                     | 450 (9.5)                                          | 3,770 (7.6)                                                       |
| Unknown                                   | 457 (9.6)                                          | 3,915 (7.9)                                                       |
| Sepsis severity, no. (%)                  |                                                    |                                                                   |
| Severe sepsis                             | 2,696 (56.7)                                       | 26,995 (54.7)                                                     |
| Septic shock                              | 2,063 (43.3)                                       | 22,336 (45.3)                                                     |
| First serum lactate > 4.0 mmol/L, no. (%) | 1,363 (28.6)                                       | 14,143 (28.7)                                                     |
| Persistent hypotension, no. (%)           | 2,145 (45.1)                                       | 19,469 (39.5)                                                     |
| In-hospital mortality, no. (%)            | 1,359 (28.6)                                       | 11,251 (22.8)                                                     |

**Table S4.** Additional patient characteristics

|                                           | All patients   | 3-hour bundle completed in 3 hours |              | P value <sup>†</sup> |
|-------------------------------------------|----------------|------------------------------------|--------------|----------------------|
|                                           |                | Yes                                | No           |                      |
| No.                                       | 49,331 (100.0) | 40,696 (82.5)                      | 8,635 (17.5) |                      |
| Site of infection, no. (%)                |                |                                    |              | <0.001               |
| Urinary                                   | 13,439 (27.2)  | 10,963 (26.9)                      | 2,476 (28.7) |                      |
| Respiratory                               | 19,839 (40.2)  | 16,806 (41.3)                      | 3,033 (35.1) |                      |
| Gastrointestinal                          | 4,649 (9.4)    | 3,580 (8.8)                        | 1,069 (12.4) |                      |
| Skin                                      | 3,480 (7.1)    | 2,921 (7.2)                        | 559 (6.5)    |                      |
| Central Nervous System                    | 239 (0.5)      | 201 (0.5)                          | 38 (0.4)     |                      |
| Other                                     | 3,770 (7.6)    | 3,073 (7.6)                        | 697 (8.1)    |                      |
| Unknown                                   | 3,915 (7.9)    | 3,152 (7.8)                        | 763 (8.8)    |                      |
| Positive blood cultures, no. (%)          |                |                                    |              | <0.001               |
| Gram positive                             | 7,178 (14.5)   | 6,078 (14.9)                       | 1,100 (12.7) |                      |
| Gram negative                             | 6,431 (13.0)   | 5,455 (13.4)                       | 976 (11.3)   |                      |
| Other <sup>^</sup>                        | 965 (2.0)      | 789 (1.9)                          | 176 (2.0)    |                      |
| None                                      | 34,757 (70.5)  | 28,374 (69.2)                      | 6,383 (73.9) |                      |
| First serum lactate > 4.0 mmol/L, no. (%) | 14,143 (28.7)  | 11,941 (29.3)                      | 2,205 (25.5) | < 0.001              |
| Persistent hypotension, no. (%)           | 19,469 (39.5)  | 15,915 (39.1)                      | 3,554 (41.2) | < 0.001              |

† p-values based on Pearson chi-square for categorical variables and the Wilcoxon rank-sum test for continuous variables

<sup>^</sup> Other includes anaerobic, mixed, viral, fungal, and yeast cultures

**Table S5.** Risk adjusted odds ratio of in-hospital mortality with 95% confidence interval for time to completing the 3-hour bundle and confounders

| <b>Variable</b>                                       | <b>Odds ratio for in-hospital mortality</b> | <b>95% CI</b> |       | <b>p-value</b> |
|-------------------------------------------------------|---------------------------------------------|---------------|-------|----------------|
| Time to complete the 3-hour bundle, per hour          | 1.036                                       | 1.023         | 1.048 | < 0.001        |
| Month of study                                        | 0.992                                       | 0.988         | 0.995 | < 0.001        |
| <b>Race/ethnicity</b>                                 |                                             |               |       |                |
| White, non-Hispanic                                   | ref                                         |               |       |                |
| Black, non-Hispanic                                   | 0.996                                       | 0.92          | 1.077 | 0.912          |
| Hispanic                                              | 0.871                                       | 0.793         | 0.958 | 0.004          |
| Multi-racial                                          | 1.171                                       | 0.943         | 1.454 | 0.154          |
| Unknown, non-Hispanic                                 | 0.955                                       | 0.865         | 1.054 | 0.356          |
| Unknown                                               | 0.995                                       | 0.908         | 1.091 | 0.918          |
| <b>Payer</b>                                          |                                             |               |       |                |
| Medicare                                              | ref                                         |               |       |                |
| Medicaid                                              | 0.983                                       | 0.904         | 1.068 | 0.684          |
| Private, Health Maintenance Organization              | 1.038                                       | 0.965         | 1.116 | 0.316          |
| Self-Pay                                              | 1.797                                       | 1.441         | 2.241 | < 0.001        |
| Other                                                 | 1.043                                       | 0.908         | 1.199 | 0.55           |
| <b>Site of infection</b>                              |                                             |               |       |                |
| Urinary                                               | ref                                         |               |       |                |
| Respiratory                                           | 1.773                                       | 1.65          | 1.907 | < 0.001        |
| Gastrointestinal                                      | 1.948                                       | 1.781         | 2.131 | < 0.001        |
| Skin                                                  | 1.588                                       | 1.42          | 1.776 | < 0.001        |
| Central Nervous System                                | 1.446                                       | 0.977         | 2.139 | 0.065          |
| Other                                                 | 1.666                                       | 1.504         | 1.845 | < 0.001        |
| Unknown                                               | 2.309                                       | 2.101         | 2.538 | < 0.001        |
| <b>Admission source</b>                               |                                             |               |       |                |
| Non-health facility                                   | ref                                         |               |       |                |
| Clinic                                                | 0.908                                       | 0.781         | 1.055 | 0.207          |
| Skilled nursing facility / intermediate care facility | 1.286                                       | 1.216         | 1.36  | < 0.001        |
| Another health care facility                          | 1.068                                       | 0.84          | 1.357 | 0.593          |
| Between unit transfer                                 | 1.311                                       | 0.758         | 2.266 | 0.333          |
| Hospice                                               | 1.951                                       | 0.99          | 3.844 | 0.053          |
| Other                                                 | 0.893                                       | 0.609         | 1.31  | 0.562          |
| <b>Septic shock diagnosis</b>                         |                                             |               |       |                |
| Severe Sepsis                                         | ref                                         |               |       |                |
| Septic Shock                                          | 2.199                                       | 2.075         | 2.331 | < 0.001        |
| <b>Platelet count</b>                                 |                                             |               |       |                |
| No                                                    | ref                                         |               |       |                |
| Yes                                                   | 1.339                                       | 1.268         | 1.414 | < 0.001        |
| <b>Metastatic cancer</b>                              |                                             |               |       |                |
| No                                                    | ref                                         |               |       |                |

|                                                                                                                                                                                                                              |       |       |       |         |
|------------------------------------------------------------------------------------------------------------------------------------------------------------------------------------------------------------------------------|-------|-------|-------|---------|
| Yes                                                                                                                                                                                                                          | 1.871 | 1.734 | 2.018 | < 0.001 |
| Lymphoma/leukemia/multiple myeloma                                                                                                                                                                                           |       |       |       |         |
| No                                                                                                                                                                                                                           | ref   |       |       |         |
| Yes                                                                                                                                                                                                                          | 1.077 | 0.967 | 1.201 | 0.178   |
| Interaction terms included (not shown, all p<0.001): i.) Lower respiratory tract infection x mechanical ventilation, ii.) age x square root of comorbidities x age, iii.) first serum lactate x square root of comorbidities |       |       |       |         |

**Table S6.** Sensitivity analyses

| Model          |                                                                                               | No. of encounters in the model | OR (95%CI) for one hour change in completing the 3-hr bundle | OR (95%CI) for hour change in administration of antibiotics | OR (95%CI) for hour change in completing the initial IV fluid bolus |
|----------------|-----------------------------------------------------------------------------------------------|--------------------------------|--------------------------------------------------------------|-------------------------------------------------------------|---------------------------------------------------------------------|
| Primary cohort |                                                                                               | 49,331                         | 1.036<br>(1.023 – 1.048)<br>p < 0.001                        | 1.046<br>(1.030 – 1.061)<br>p < 0.001                       | 1.009<br>(0.995 – 1.022)<br>p = 0.215                               |
|                | Includes protocol initiated within 24 hours after ED arrival                                  | 51,573                         | 1.035<br>(1.023 – 1.047)<br>p < 0.001                        | 1.044<br>(1.029 – 1.059)<br>p < 0.001                       | 1.001<br>(1.000 – 1.002)<br>p = 0.029                               |
|                | All encounters with 3-hour bundle completed up to 24 hours after protocol initiated           | 49,921                         | 1.023<br>(1.015 – 1.030)<br>p < 0.001                        | 1.034<br>(1.028 – 1.045)<br>p < 0.001                       | 1.001<br>(1.000 – 1.003)<br>p = 0.012                               |
|                | Up to 24 hours for protocol initiated <u>and</u> up to 24 hours to complete the 3 hour bundle | 52,902                         | 1.025<br>(1.018 – 1.033)<br>p < 0.001                        | 1.037<br>(1.027 – 1.048)<br>p < 0.001                       | 1.001<br>(1.000 – 1.002)<br>p = 0.019                               |
|                | ED arrival as “time zero”                                                                     | 49,331                         | 1.032<br>(1.023 – 1.048)<br>p < 0.001                        | 1.037<br>(1.023 – 1.051)<br>p < 0.001                       | 1.009<br>(0.995 – 1.024)<br>p = 0.198                               |
|                | Including hospice discharges as in-hospital deaths                                            | 49,331                         | 1.034<br>(1.021 – 1.046)<br>p < 0.001                        | 1.044<br>(1.039 – 1.059)<br>p < 0.001                       | 1.009<br>(0.995 – 1.023)<br>p = 0.226                               |
|                | Excluding bundle elements that occur prior to protocol initiation                             | 30,782                         | 1.036<br>(1.022 – 1.047)<br>p < 0.001                        | 1.043<br>(1.027 – 1.059)<br>p < 0.001                       | 1.012<br>(0.996 – 1.027)<br>p = 0.139                               |

**Table S7.** Hospital characteristics stratified by quartile of reliability-adjusted rate of completing the 3-hr bundle within 3 hours.

| Characteristic                        | Quartiles of the probability of completing the 3-hour bundle in 3 hours |                 |                 |                 |
|---------------------------------------|-------------------------------------------------------------------------|-----------------|-----------------|-----------------|
|                                       | 1 <sup>st</sup>                                                         | 2 <sup>nd</sup> | 3 <sup>rd</sup> | 4 <sup>th</sup> |
|                                       | Lowest                                                                  | Below median    | Above median    | Highest         |
| No. of hospitals                      | 38                                                                      | 41              | 35              | 35              |
| No. of patients                       | 12,647                                                                  | 12,048          | 12,891          | 11,745          |
| Serum lactate, median [IQR], mmol/L   | 2.8 [1.8 - 4.5]                                                         | 2.7 [1.7 - 4.3] | 2.7 [1.7 - 4.4] | 2.7 [1.7 - 4.3] |
| Area, no. (%) *                       |                                                                         |                 |                 |                 |
| Metro                                 | 37 (97.4)                                                               | 32 (78.1)       | 30 (85.7)       | 31 (88.6)       |
| Rural                                 | 1 (2.65)                                                                | 9 (21.9)        | 5 (14.3)        | 4 (11.4)        |
| Teaching facility, no. (%) ~          |                                                                         |                 |                 |                 |
| No                                    | 8 (21.0)                                                                | 14 (34.1)       | 10 (28.6)       | 16 (45.7)       |
| Yes                                   | 30 (79.0)                                                               | 27 (65.9)       | 25 (71.4)       | 19 (54.3)       |
| Number of hospital beds, median (IQR) | 312 (223-464)                                                           | 265 (130-362)   | 312 (192-514)   | 228 (171-375)   |

\*Teaching hospital defined by NYSDOH using graduate medical education codes on Medicaid claims, verified by the Office of Primary Care and Health Systems Management and the Department of Education

~Hospital rurality is defined by rural-urban commuting codes, where rural corresponds to non-metropolitan / urban population

## References

1. Levy MM, Fink MP, Marshall JC, et al. 2001 SCCM/ESICM/ACCP/ATS/SIS International Sepsis Definitions Conference. *Crit Care Med.* 2003;31(4):1250-1256.
2. Lash TL FM, Fink AK. Applying quantitative bias analysis to epidemiologic data. Springer; 2009.
